# Supplementary material for: Concentrations of Major and Trace Elements within the Snowpack of Tyumen, Russia
Source: MDPI journal article supplement (doi:10.3390/min11070709), 2021-06-30
Supplement: s1 [file s1]

Table S1. Description of sampling sites

| Sample name | Sample number | Latitude | Longitude | Location                    | Collection date |
|-------------|---------------|----------|-----------|-----------------------------|-----------------|
| T1-2020     | 1             | 57,08900 | 65,62300  | Industrial zone             | 17.02.2020      |
| T3-2020     | 2             | 57,10100 | 65,60900  | transport zone              | 17.02.2020      |
| T4-2020     | 3             | 57,10900 | 65,61400  | modern business zone        | 17.02.2020      |
| T6-2020     | 4             | 57,11400 | 65,57600  | transport zone              | 17.02.2020      |
| T7-2020     | 5             | 57,12861 | 65,57333  | high-rise residential area  | 17.02.2020      |
| T9-2020     | 6             | 57,14111 | 65,56139  | modern business zone        | 17.02.2020      |
| T10-2020    | 7             | 57,14500 | 65,58111  | high-rise residential area  | 17.02.2020      |
| T11-2020    | 8             | 57,15556 | 65,56028  | transport zone              | 17.02.2020      |
| T13-2020    | 9             | 57,13000 | 65,53778  | high-rise residential area  | 18.02.2020      |
| T14-2020    | 10            | 57,12968 | 65,52968  | modern business zone        | 18.02.2020      |
| T15-2020    | 11            | 57,12861 | 65,52333  | high-rise residential area  | 18.02.2020      |
| T16-2020    | 12            | 57,13472 | 65,50028  | high-rise residential area  | 18.02.2020      |
| T17-2020    | 13            | 57,13806 | 65,51417  | modern business zone        | 18.02.2020      |
| T19-2020    | 14            | 57,15306 | 65,61028  | Industrial zone             | 18.02.2020      |
| T21-2020    | 15            | 57,11167 | 65,64611  | Industrial zone             | 18.02.2020      |
| T22-2020    | 16            | 57,11667 | 65,62194  | transport zone              | 18.02.2020      |
| T23-2020    | 17            | 57,12139 | 65,59000  | Industrial zone             | 19.02.2020      |
| T25-2020    | 18            | 57,13333 | 65,60278  | high-rise residential area  | 19.02.2020      |
| T26-2020    | 19            | 57,17750 | 65,60417  | transport zone              | 19.02.2020      |
| T28-2020    | 20            | 57,18694 | 65,62333  | high-rise residential area  | 19.02.2020      |
| T29-2020    | 21            | 57,19861 | 65,52806  | transport zone              | 19.02.2020      |
| T31-2020    | 22            | 57,15028 | 65,53611  | historical center           | 19.02.2020      |
| T32-2020    | 23            | 57,15750 | 65,55139  | historical center           | 19.02.2020      |
| T34-2020    | 24            | 57,15694 | 65,52472  | historical center           | 19.02.2020      |
| T35-2020    | 25            | 57,15611 | 65,51306  | historical center           | 19.02.2020      |
| T37-2020    | 26            | 57,18528 | 65,51444  | low-rise residential area   | 19.02.2020      |
| T38-2020    | 27            | 57,18750 | 65,46861  | low-rise residential area   | 19.02.2020      |
| T40-2020    | 28            | 57,15889 | 65,48889  | Industrial zone             | 19.02.2020      |
| T41-2020    | 29            | 57,16611 | 65,46833  | low-rise residential area   | 19.02.2020      |
| T43-2020    | 30            | 57,12056 | 65,54889  | transport zones             | 19.02.2020      |
| T44-2020    | 31            | 57,12111 | 65,50861  | transport zones             | 19.02.2020      |
| T45-2020    | 32            | 57,14528 | 65,45389  | modern business zones       | 19.02.2020      |
| T47-2020    | 33            | 57,14639 | 65,50722  | modern business zones       | 19.02.2020      |
| T48-2020    | 34            | 57,17333 | 65,53833  | transport zones             | 19.02.2020      |
| T49-2020    | 35            | 57,18361 | 65,55694  | transport zones             | 19.02.2020      |
| TFo3-2020   | 36            | 56,86722 | 65,37861  | Background area near Tyumen | 20.02.2020      |
| TFo5-2020   | 37            | 57,05583 | 64,92806  | Background area near Tyumen | 20.02.2020      |
| TFo7-2020   | 38            | 57,10000 | 65,04361  | Background area near Tyumen | 20.02.2020      |
| TFo8-2020   | 39            | 57,30861 | 64,98472  | Background area near Tyumen | 20.02.2020      |
| TFo10-2020  | 40            | 57,35167 | 64,88722  | Background area near Tyumen | 20.02.2020      |
| TFo11-2020  | 41            | 57,22389 | 65,06278  | Background area near Tyumen | 20.02.2020      |

Table S2. Methods of analysis, analytical results and recovery of certified reference material “Trace Metals in Drinking Water”

| Element | Method | Certified value | Found 1 | Recovery,% | Found 2 | Recovery,% |
|---------|--------|-----------------|---------|------------|---------|------------|
| Na      | AES    | 6000            | 5920    | 99         | 5779    | 96         |
| Mg      | AES    | 9000            | 8894    | 99         | 8888    | 99         |
| Al      | AES    | 120             | 123     | 103        | 122     | 102        |
| P       | AES    | -               | <DL     | -          | <DL     | -          |
| S       | AES    | -               | <DL     | -          | <DL     | -          |
| K       | AES    | 2500            | 2454    | 98         | 2536    | 101        |
| Ca      | AES    | 35000           | 35366   | 101        | 35224   | 101        |
| Sc      | AES    | -               | <DL     | -          | <DL     | -          |
| Ti      | AES    | -               | <DL     | -          | <DL     | -          |
| V       | MS     | 30              | 30,1    | 100        | 30,1    | 100        |
| Cr      | MS     | 20              | 20,3    | 102        | 20,7    | 103        |
| Mn      | MS     | 40              | 40,2    | 100        | 40,0    | 100        |
| Fe      | MS     | 100             | 97,9    | 98         | 104     | 104        |
| Co      | MS     | 25              | 25,3    | 101        | 25,4    | 101        |
| Ni      | MS     | 60              | 61,4    | 102        | 59,8    | 100        |
| Cu      | MS     | 20              | 20,9    | 104        | 20,0    | 100        |
| Zn      | MS     | 70              | 69,2    | 99         | 70,6    | 101        |
| Ga      | MS     | -               | <DL     | -          | <DL     | -          |
| Ge      | MS     | -               | <DL     | -          | <DL     | -          |
| As      | MS     | 80              | 80,0    | 100        | 80,0    | 100        |
| Se      | MS     | 10              | 10,4    | 104        | 10,1    | 101        |
| Br      | MS     | -               | <DL     | -          | <DL     | -          |
| Sr      | MS     | 250             | 251     | 100        | 251     | 100        |
| Ba      | MS     | 50              | 51,8    | 104        | 50,7    | 101        |
| Hg      | MS     | -               | <DL     | -          | <DL     | -          |
| Pb      | MS     | 40              | 40,3    | 101        | 39,7    | 99         |
| Li      | MS     | 20              | 20      | 99         | 19,3    | 96         |
| Be      | MS     | 20              | 20      | 100        | 20,7    | 103        |
| Rb      | MS     | 10              | 10      | 101        | 9,9     | 99         |
| Y       | MS     | -               | <DL     | -          | <DL     | -          |
| Zr      | MS     | -               | <DL     | -          | <DL     | -          |
| Nb      | MS     | -               | <DL     | -          | <DL     | -          |
| Mo      | MS     | 100             | 104     | 104        | 101,4   | 101        |
| Ru      | MS     | -               | <DL     | -          | <DL     | -          |
| Rh      | MS     | -               | <DL     | -          | <DL     | -          |
| Pd      | MS     | -               | <DL     | -          | <DL     | -          |
| Ag      | MS     | 2               | 2       | 110        | 2       | 108        |
| Cd      | MS     | 10              | 10      |            | 10      | 101        |
| In      | MS     | -               | <DL     | -          | <DL     | -          |
| Sn      | MS     | -               | 233     | -          | 0       | -          |
| Sb      | MS     | 10              | 11      | 106        | 10      | 104        |
| Te      | MS     | 3               | 3       | 98         | 3       | 102        |
| Cs      | MS     | -               | 0,018   | -          | 0,016   | -          |
| La      | MS     | -               | 0,017   | -          | 0,015   | -          |
| Ce      | MS     | -               | 0,031   | -          | 0,031   | -          |

|    |    |    |      |     |       |     |
|----|----|----|------|-----|-------|-----|
| Pr | MS | -  | <DL  | -   | <DL   | -   |
| Nd | MS | -  | <DL  | -   | <DL   | -   |
| Sm | MS | -  | <DL  | -   | <DL   | -   |
| Eu | MS | -  | <DL  | -   | <DL   | -   |
| Gd | MS | -  | <DL  | -   | <DL   | -   |
| Tb | MS | -  | <DL  | -   | <DL   | -   |
| Dy | MS | -  | <DL  | -   | <DL   | -   |
| Ho | MS | -  | <DL  | -   | <DL   | -   |
| Er | MS | -  | <DL  | -   | <DL   | -   |
| Tm | MS | -  | <DL  | -   | <DL   | -   |
| Yb | MS | -  | <DL  | -   | <DL   | -   |
| Lu | MS | -  | <DL  | -   | <DL   | -   |
| Hf | MS | -  | 24,8 | -   | 0,013 | -   |
| Ta | MS | -  | 12,6 | -   | 0,011 | -   |
| W  | MS | -  | 27,7 | -   | 0,025 | -   |
| Re | MS | -  | 161  | -   | 0,159 | -   |
| Os | MS | -  | <DL  | -   | <DL   | -   |
| Ir | MS | -  | <DL  | -   | <DL   | -   |
| Pt | MS | -  | <DL  | -   | <DL   | -   |
| Au | MS | -  | <DL  | -   | <DL   | -   |
| Tl | MS | 10 | 10,1 | 101 | 10,1  | 101 |
| Bi | MS | 10 | 10,1 | 101 | 9,9   | 99  |
| Th | MS | -  | <DL  | -   | <DL   | -   |
| U  | MS | 10 | 10,2 | 102 | 10,3  | 103 |

---

Table S3. Methods of analysis, analytical results and recovery of certified reference material "Gabbro Essexit STD-2A (GSO 8670-2005)

| Element                        | Method  | Certified value | Found | Recovery, % |
|--------------------------------|---------|-----------------|-------|-------------|
| Li                             | AES, MS | 8,6             | 10,4  | 121         |
| Be                             | MS      | 0,8             | 0,7   | 90          |
| Na <sub>2</sub> O              | AES     | 7,51            | 7,5   | 100         |
| MgO                            | AES     | 14,63           | 14,8  | 101         |
| Al <sub>2</sub> O <sub>3</sub> | AES     | 14,63           | 14,8  | 101         |
| P <sub>2</sub> O <sub>5</sub>  | AES     | 0,17            | 0,17  | 98          |
| S                              | AES     | 0,026           | 0,03  | 112         |
| K <sub>2</sub> O               | AES     | 0,46            | 0,47  | 102         |
| CaO                            | AES     | 10,42           | 10,53 | 101         |
| Sc                             | MS      | 41              | 39,8  | 97          |
| Ti                             | AES, MS | 1,59            | 1,6   | 100         |
| V                              | AES, MS | 315             | 320   | 102         |
| Cr                             | AES, MS | 213             | 230   | 108         |
| Mn                             | AES, MS | 0,21            | 0,23  | 107         |
| Fe <sub>2</sub> O <sub>3</sub> | AES     | 14,62           | 14,6  | 100         |
| Co                             | MS      | 52              | 54,6  | 105         |
| Ni                             | AES, MS | 126             | 123   | 98          |
| Cu                             | AES, MS | 180             | 188   | 105         |
| Zn                             | AES, MS | 112             | 111   | 99          |
| Ga                             | MS      | 17              | 20,1  | 118         |
| As                             | MS      | -               | <DL   | -           |
| Se                             | MS      | -               | <DL   | -           |
| Rb                             | MS      | 11              | 11,1  | 100         |
| Sr                             | AES, MS | 197             | 200   | 102         |
| Y                              | MS      | 29              | 30,0  | 103         |
| Zr                             | MS      | 125             | 108   | 86          |
| Nb                             | MS      | 6,0             | 5,2   | 86          |
| Mo                             | MS      | 1,0             | 0,67  | 69          |
| Rh                             | MS      | -               | <DL   | -           |
| Pd                             | MS      | -               | <DL   | -           |
| Ag                             | MS      | 0,06            | 0,065 | 108         |
| Cd                             | MS      | -               | 0,1   | -           |
| Sn                             | MS      | 1,6             | 1,04  | 64          |
| Sb                             | MS      | -               | 0,149 | -           |
| Te                             | MS      | -               | <DL   | -           |
| Cs                             | MS      | 0,5             | 0,35  | 78          |
| Ba                             | AES, MS | 227             | 153   | 67          |
| La                             | MS      | 8               | 8,2   | 103         |
| Ce                             | MS      | 22              | 19,8  | 90          |
| Pr                             | MS      | 2,6             | 2,7   | 105         |
| Nd                             | MS      | 13,2            | 13,1  | 99          |
| Sm                             | MS      | 4,0             | 3,9   | 98          |
| Eu                             | MS      | 1,4             | 1,3   | 94          |
| Gd                             | MS      | 4,5             | 4,7   | 104         |
| Tb                             | MS      | 0,8             | 0,8   | 101         |

|    |    |        |       |     |
|----|----|--------|-------|-----|
| Dy | MS | 5,1    | 5,2   | 102 |
| Ho | MS | 1,0    | 1,1   | 110 |
| Er | MS | 2,9    | 3,2   | 110 |
| Tm | MS | 0,44   | 0,45  | 103 |
| Yb | MS | 3,3    | 3,1   | 95  |
| Lu | MS | 0,44   | 0,44  | 99  |
| Hf | MS | 2,7    | 2,9   | 106 |
| Ta | MS | 0,4    | 0,31  | 90  |
| W  | MS | 0,3    | 0,21  | 71  |
| Re | MS | -      | <DL   | -   |
| Ir | MS | -      | <DL   | -   |
| Pt | MS | -      | <DL   | -   |
| Au | MS | 0.0026 | <DL   | -   |
| Hg | MS | -      | 0,016 | -   |
| Tl | MS | -      | 0,051 | -   |
| Pb | MS | 3,0    | 2,4   | 80  |
| Bi | MS | -      | <DL   | -   |
| Th | MS | 1,0    | 1,1   | 111 |
| U  | MS | 0,5    | 0,47  | 105 |

---
